# Supplementary material for: Metabolomics analysis of type 2 diabetes remission identifies 12 metabolites with predictive capacity: a CORDIOPREV clinical trial study
Source: Springer Nature journal article supplement (doi:10.1186/s12916-022-02566-z), 2022-10-27
Supplement: MOESM1 [file 23646740]

|                                                      | <b>Responders</b> | <b>Non- Responders</b> | <i>p value</i> |
|------------------------------------------------------|-------------------|------------------------|----------------|
|                                                      | <b>(n=73)</b>     | <b>(n=110)</b>         |                |
| Men/Women                                            | 60/13             | 92/18                  | 0.799          |
| Age (years)                                          | 60.8±1.0          | 59.3±0.9               | 0.252          |
| Weight (kg)                                          | 80.2±1.3          | 88.4±1.4               | <0.001         |
| Body mass index (kg/m <sup>2</sup> )                 | 29.9±0.4          | 32.1±0.4               | 0.001          |
| Waist circumference (cm)                             | 101±1             | 108±1                  | <0.001         |
| Triglycerides (mmol/L)                               | 1.48±0.10         | 1.69±0.07              | 0.090          |
| Total-cholesterol (mmol/L)                           | 4.16±0.08         | 4.31±0.08              | 0.203          |
| HDL-cholesterol (mmol/L)                             | 1.11±0.03         | 1.06±0.02              | 0.141          |
| LDL-cholesterol (mmol/L)                             | 2.31±0.07         | 2.42±0.07              | 0.302          |
| C-reactive protein (nmol/L)                          | 37.1±5.3          | 33.5±3.6               | 0.558          |
| HbA1c (mmol/mol)                                     | 47.8±0.9          | 50.7±0.9               | 0.032          |
| HbA1c (%)                                            | 6.53±0.08         | 6.79±0.08              | 0.032          |
| Glucose (mmol/L)                                     | 5.50± 0.09        | 6.58±0.14              | <0.001         |
| Insulin (nmol/L)                                     | 64.4± 5.5         | 93.3±7.8               | 0.007          |
| HOMA-IR                                              | 3.49±0.42         | 4.84±0.32              | 0.010          |
| Insulin sensitivity index                            | 3.16±0.20         | 2.37±0.12              | <0.001         |
| Insulinogenic index                                  | 0.70±0.19         | 0.68±0.14              | 0.921          |
| Hepatic insulin resistance index                     | 1421±168          | 1970±129               | 0.009          |
| Muscle Insulin sensitivity index (x10 <sup>2</sup> ) | 1.93±0.22         | 2.20±0.25              | 0.452          |
| Disposition Index                                    | 0.68±0.06         | 0.43±0.02              | <0.001         |

**Table S1. Baseline characteristics of the study population.** Data are mean±SEM. Responders group: patients who reverted from type 2 diabetes after 5 years of dietary intervention follow-up. Non-Responders group: patients who remained with type 2 diabetes after 5 years of follow-up. *p*-values were calculated by One-way ANOVA. Gender *p*-value by chi square analysis.
