# Supplementary material for: Metabolomics analysis of type 2 diabetes remission identifies 12 metabolites with predictive capacity: a CORDIOPREV clinical trial study
Source: Springer Nature journal article supplement (doi:10.1186/s12916-022-02566-z), 2022-10-27
Supplement: MOESM2 [file 23646740]

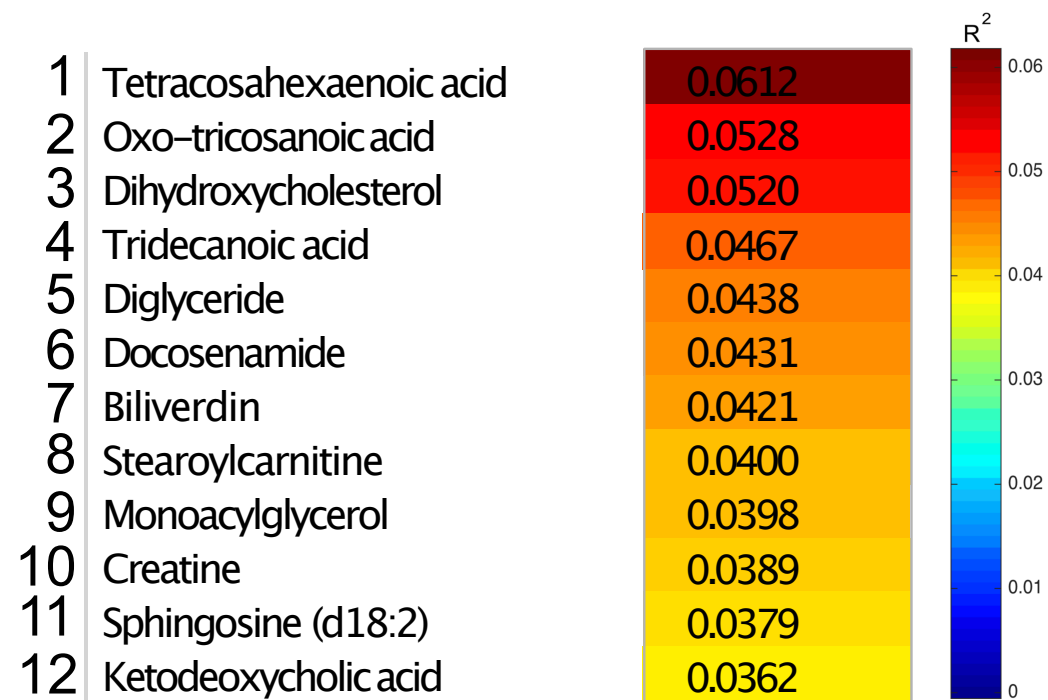

**Figure S1.** Ranking with the 12 most significant metabolites derived from the O-PLS DA model. They are organised from top to down from the most significant to the least, and the numeric R squared value.

A)

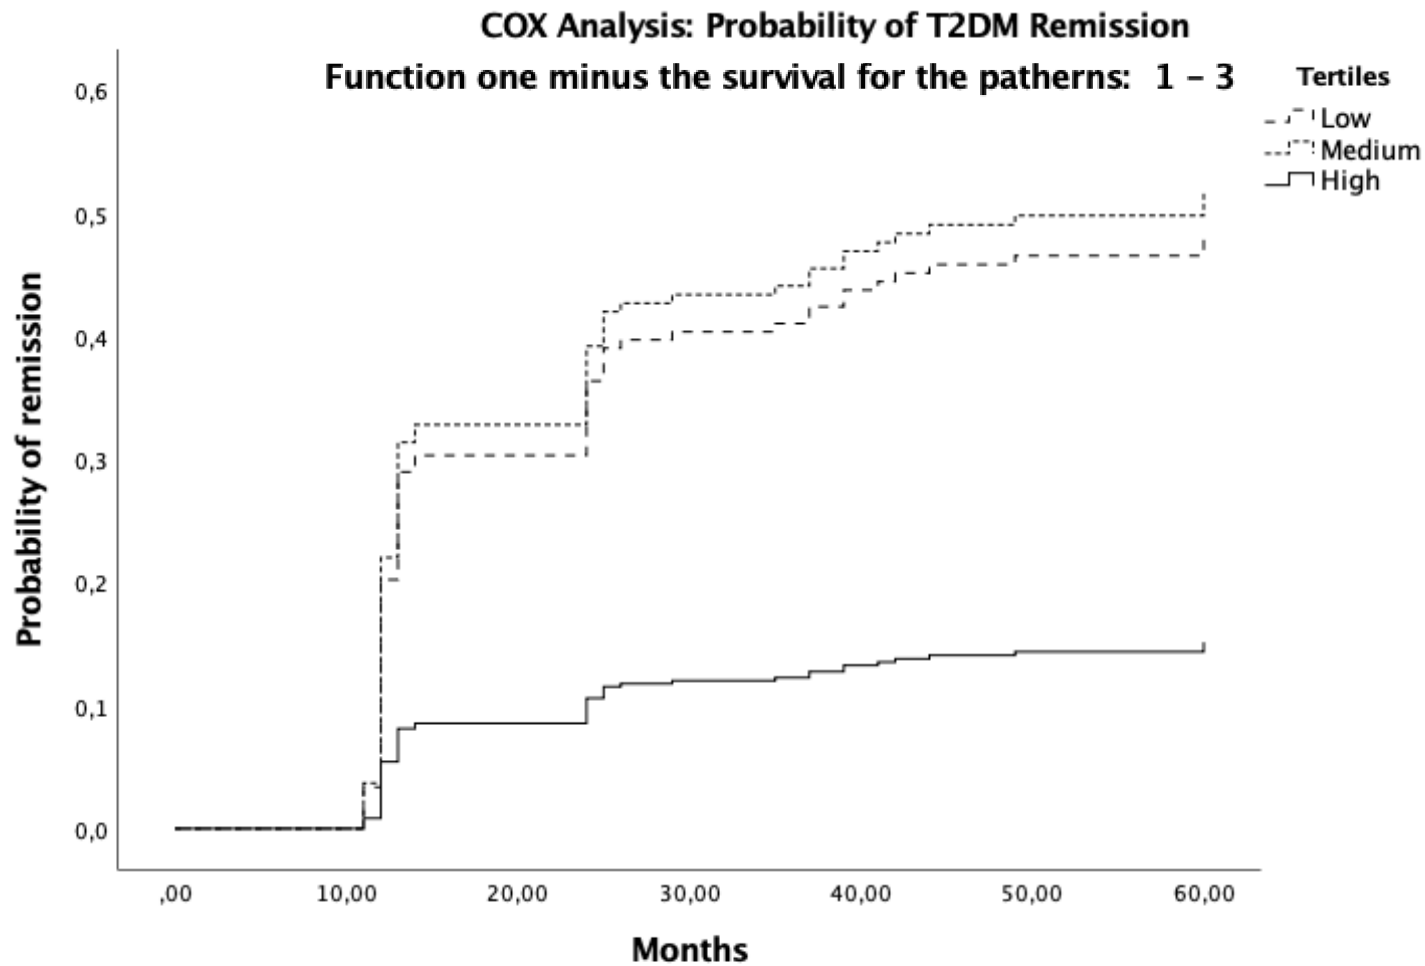

B)

|                         |            | HR   | 95.0% CI for HR |       |
|-------------------------|------------|------|-----------------|-------|
|                         |            |      | Lower           | Upper |
| <b>Tertile 1</b>        | Unadjusted | 4.04 | 1.80            | 9.05  |
|                         | Adjusted*  | 3.80 | 1.67            | 8.63  |
| <b>Tertile 2</b>        | Unadjusted | 4.45 | 1.93            | 10.25 |
|                         | Adjusted*  | 4.31 | 1.83            | 10.17 |
| <b>Tertile 3 (ref.)</b> |            | 1.00 | 1.00            | 1.00  |

**Figure S2. Adjusted Cox for the analysis of the patient risk scored grouped in ascending tertiles of glycated haemoglobin.**
